# Supplementary material for: The ETS factor ESE3/EHF represses IL-6 preventing STAT3 activation and expansion of the prostate cancer stem-like compartment
Source: PubMed Central journal article supplement (PMC5363547; doi:10.18632/oncotarget.12525), 2016-10-08
Supplement: oncotarget-07-76756-s001.pdf [file oncotarget-07-76756-s001.pdf]

## The ETS factor ESE3/EHF represses IL-6 preventing STAT3 activation and expansion of the prostate cancer stem-like compartment

### Supplementary Materials

**Supplementary Table S1: Primer sets for qRT-PCR and ChIP experiments**

| Assay   | Gene/Region    | Sequence 5' to 3'       | Primer Name    |
|---------|----------------|-------------------------|----------------|
| qRT-PCR | <i>IL6</i>     | ccacacagacagccactcac    | IL6 LEFT       |
| qRT-PCR | <i>IL6</i>     | ttcagccatctttggaagg     | IL6 RIGHT      |
| qRT-PCR | <i>IL6</i>     | agtgaggaacaagccagagc    | IL6 set3 LEFT  |
| qRT-PCR | <i>IL6</i>     | agatgcaataaccaccctg     | IL6 set3 RIGHT |
| qRT-PCR | <i>Stat3</i>   | ggaggagttgcagcaaaaag    | STAT3 LEFT     |
| qRT-PCR | <i>Stat3</i>   | gattctctctccagcatcg     | STAT3 RIGHT    |
| qRT-PCR | <i>Lin28A</i>  | agcatgcagaagcgcagatcaa  | Lin28A LEFT    |
| qRT-PCR | <i>Lin28A</i>  | agagcatcagccatattggtagc | Lin28A RIGHT   |
| qRT-PCR | <i>Lin28B</i>  | gccccttggatattccagtc    | Lin28B LEFT    |
| qRT-PCR | <i>Lin28B</i>  | cttccaaaggccttgagtea    | Lin28B RIGHT   |
| qRT-PCR | <i>BMI-1</i>   | tcaccttctgctgatgctg     | BMI-1 LEFT     |
| qRT-PCR | <i>BMI-1</i>   | ccgatccaatctgttctggt    | BMI-1 RIGHT    |
| qRT-PCR | <i>NANOG</i>   | cagtctggacactggctgaa    | NANOG LEFT     |
| qRT-PCR | <i>NANOG</i>   | ctcgctgattagctccaac     | NANOG RIGHT    |
| qRT-PCR | <i>POU5F1</i>  | agcgatcaagcagcgactat    | POU5F1 LEFT    |
| qRT-PCR | <i>POU5F1</i>  | tagcctgggtaccaaaatg     | POU5F1 RIGHT   |
| qRT-PCR | <i>β-ACTIN</i> | attggcaatgagcgggtc      | β-ACTIN LEFT   |
| qRT-PCR | <i>β-ACTIN</i> | ggatgccacaggactccat     | β-ACTIN RIGHT  |

| Assay           | Gene/Region     | Sequence 5' to 3'      | Predicted EBS | Primer Name    |
|-----------------|-----------------|------------------------|---------------|----------------|
| Real Time- ChIP | <i>IL6 EBS1</i> | acagctgggaagacgagaaa   | -550 -557     | IL6_EBS1 LEFT  |
| Real Time- ChIP | <i>IL6 EBS1</i> | ggaagttcgtgtcatgataaaa | -550 -557     | IL6_EBS1 RIGHT |
| Real Time- ChIP | <i>GAPDH</i>    | tcctctgtttcatccaagc    | None          | GAPDH_LEFT     |
| Real Time- ChIP | <i>GAPDH</i>    | tagtagccgggcctacttt    | None          | GAPDH_RIGHT    |
